# Supplementary material for: Synergistically optimized electrical and thermal properties by introducing electron localization and phonon scattering centers in CuGaTe2with enhanced mechanical properties
Source: Royal Society of Chemistry journal article supplement (doi:10.1039/d0tc00795a), 2020-01-01
Supplement: d0tc00795a1.pdf [file d0tc00795a1.pdf]

Supporting information for

**Synergistically optimized electrical and thermal properties by introducing electron localization and phonon scattering centers for CuGaTe<sub>2</sub> with enhanced mechanical properties**

Jian Zhang<sup>a\*</sup>, Lulu Huang<sup>a,b</sup>, Chen Zhu<sup>a,b</sup>, Zhenhua Ge<sup>c</sup>, Yuanyue Li<sup>d</sup>, Di Li<sup>a\*</sup>, Xiaoying Qin<sup>a\*</sup>

<sup>a</sup> Key Laboratory of Materials Physics, Institute of Solid State Physics, Chinese Academy of Sciences, Hefei 230031, PR China

<sup>b</sup> University of Science and Technology of China, Hefei 230026, China

<sup>c</sup> Faculty of Materials Science and Engineering, Kunming University of Science and Technology, Kunming, 650093, China

<sup>d</sup> College of Microtechnology & Nanotechnology, Qingdao University, Qingdao, 266071, China

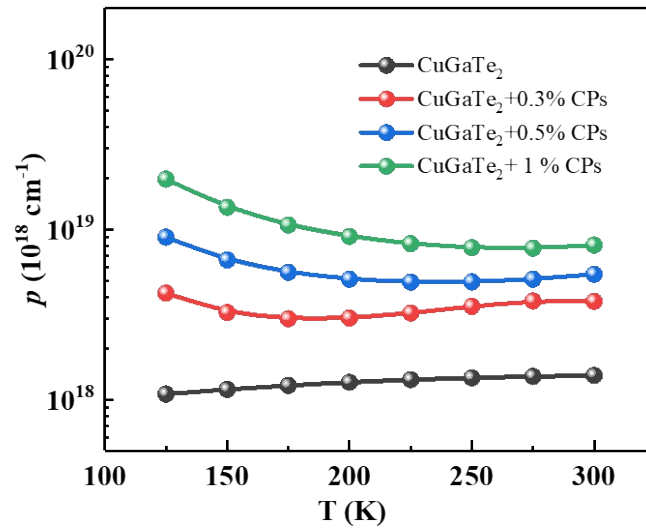

**Figure S1.** Temperature dependence of carrier concentrations ( $p$ ) of  $\text{CuGaTe}_2+x$  wt.% CPs ( $0 \leq x \leq 1$ ) samples at 300-125 K.

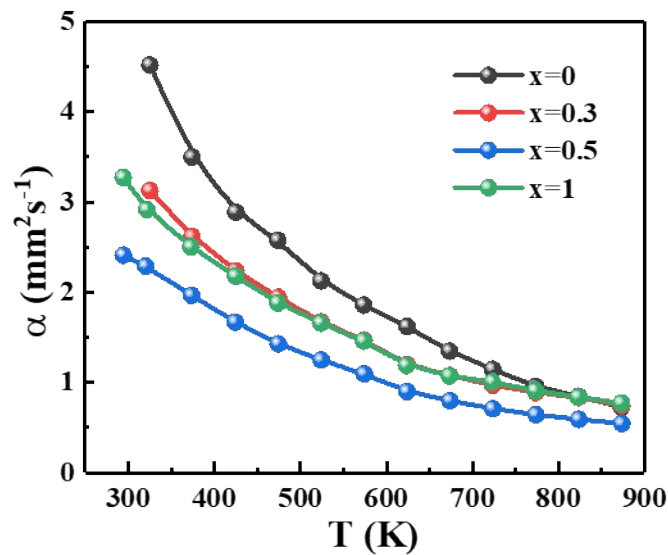

**Figure S2.** Temperature-dependent of thermal diffusivity ( $\alpha$ ) of the  $\text{CuGaTe}_2+x$  wt.% CPs ( $x=0, 0.3, 0.5, 1$ ) specimens.

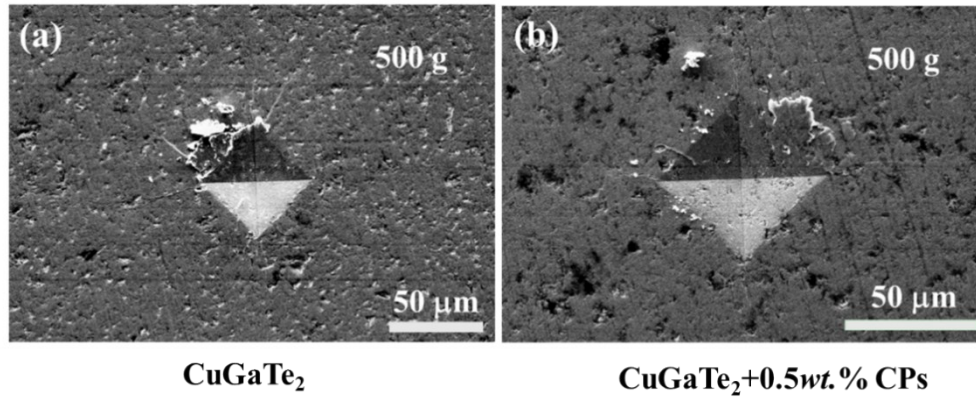

**Figure S3.** Scanning electron micrographs of radial crack systems. (a) CuGaTe<sub>2</sub> (P=500 g), (b) CuGaTe<sub>2</sub>+0.5 wt.% CPs (P=500 g).
